# Supplementary material for: Integrative perspective of the healthy aging process considering the metabolome, cardiac autonomic modulation and cardiorespiratory fitness evaluated in age groups
Source: PubMed Central journal article supplement (PMC9734749; doi:10.1038/s41598-022-25747-5), 2022-12-09
Supplement: 41598_2022_25747_MOESM1_ESM.pdf [file 41598_2022_25747_MOESM1_ESM.pdf]

# Integrative perspective of the healthy aging process considering the metabolome, cardiac autonomic modulation and cardiorespiratory fitness evaluated in age groups

Étore De Favari Signini<sup>1</sup>, Alex Castro<sup>2</sup>, Patrícia Rehder-Santos<sup>1</sup>, Juliana Cristina Millan-Mattos<sup>1</sup>, Juliana Magalhães de Oliveira<sup>2</sup>, Vinicius Minatel<sup>1</sup>, Camila Bianca Falasco Pantoni<sup>1,3</sup>; Heloisa Sobreiro Selistre de Araújo<sup>4</sup>; Fernando Fabrizzi<sup>5</sup>; Alberto Porta<sup>6,7</sup>; Antônio Gilberto Ferreira<sup>2</sup>; Regina Vincenzi Oliveira<sup>2</sup>; Aparecida Maria Catai<sup>1,\*</sup>.

<sup>1</sup> Department of Physiotherapy, Federal University of São Carlos, São Carlos, São Paulo, Brazil.

<sup>2</sup> Department of Chemistry, Federal University of São Carlos, São Carlos, São Paulo, Brazil.

<sup>3</sup> Department of Gerontology, Federal University of São Carlos, São Carlos, São Paulo, Brazil

<sup>4</sup> Department of Physiological Sciences, Federal University of São Carlos, São Carlos, São Paulo, Brazil.

<sup>5</sup> Penápolis Educational Foundation (FUNPEPE), Penápolis, São Paulo, Brazil.

<sup>6</sup> Department of Biomedical Sciences for Health, University of Milan, Milan, Italy.

<sup>7</sup> Department of Cardiothoracic, Vascular Anesthesia and Intensive Care, Policlinico San Donato, San Donato Milanese, Milan, Italy.

**Keywords:** Metabolomics, Autonomic Nervous System, Oxygen Consumption, Healthy Aging.

**Corresponding author:** Aparecida Maria Catai, PhD, Department of Physical Therapy, Cardiovascular Physical Therapy Laboratory, Nucleus of Research in Physical Exercise, Federal University of São Carlos, Via Washington Luiz, km 235, CP: 676, 13565-905, São Carlos-SP, Brazil, Tel: +55 16 33518705, Fax: +55 16 33612081, email: [mcatai@ufscar.br](mailto:mcatai@ufscar.br).  
**Co-corresponding author:** [signinietof@gmail.com](mailto:signinietof@gmail.com) (Étore De F. Signini)

**Competing Interests:** The authors have no competing interest to declare.

## **SUPPORTING INFORMATION**

**Supplementary Table S1.** Biochemical blood tests.

**Supplementary Table S2.** Cardiac autonomic control during the aging process.

**Supplementary Table S3.** Compounds identified on  $^1\text{H}$  NMR and submitted to statistical analysis considering the age groups.

**Supplementary Table S4.** Chemical structure and chemical shift ( $\delta$  - ppm) of metabolites that showed statistical significance during the aging process observed in  $^1\text{H}$  NMR.

**Supplementary Table S5.** Features detected on LC-HRMS and submitted to statistical analysis considering the age groups.

**Supplementary Table S6.** LC-HRMS data of the statistically significant features identified in serum samples.

**Supplementary Figure S1.** Instrumental stability assessed through quality control samples.

**Supplementary Figure S2:** Representation of the serum 1D  $^1\text{H}$  NMR spectrum region where the main metabolites were quantified for a single participant.

**Supplementary Figure S3.** Principal components analysis considering the five main components with eigenvalues greater than 1 for all significant variables between the age groups.

**Supplementary Table S1.** Biochemical blood tests.

| Characteristics         | All                      | G <sub>20-29</sub>       | G <sub>30-39</sub>       | G <sub>40-49</sub>      | G <sub>50-59</sub>       | G <sub>60-70</sub>       | <i>P-value</i> |
|-------------------------|--------------------------|--------------------------|--------------------------|-------------------------|--------------------------|--------------------------|----------------|
| TC (mg/dL)              | 186.50 (162.00 – 203.00) | 171.00 (139.00 – 189.00) | 179.00 (159.00 – 197.50) | 191.50 (177 – 213.25)   | 203.00 (170.25 – 207.00) | 194.00 (171.00 – 213.00) | < <b>0.001</b> |
| HDL (mg/dL)             | 54.00 (44.00 – 66.00)    | 50 (44.00 – 67.00)       | 53.00 (44.00 – 62.50)    | 50.00 (42.50 – 66.00)   | 61.00 (43.50 – 64.50)    | 59.50 (54.00 – 65.50)    | 0.688          |
| LDL (mg/dL)             | 109.50 (90.25 – 123.00)  | 93.00 (65.00 – 113.00)   | 102.00 (91.00 – 121.50)  | 118.50 (94.00 – 130.25) | 115.00 (110.00 – 132.50) | 110.00 (100.50 – 131.50) | <b>0.003</b>   |
| VLDL (mg/dL)            | 18.00 (14.00 – 25.00)    | 15.00 (12.00 – 21.00)    | 18.00 (14.00 – 24.00)    | 20.00 (14.00 – 27.00)   | 21.00 (16.00 – 26.50)    | 19.00 (14.25 – 23.75)    | 0.413          |
| Triglycerides (mg/dL)   | 90.50 (68.00 – 126.75)   | 75.00 (60.00 – 105.00)   | 89.00 (68.50 – 120.50)   | 99.00 (68.25 – 136.50)  | 104.00 (81.00 – 131.25)  | 96.00 (69.25 – 118.50)   | 0.437          |
| Uric acid (mg/dL)       | 5.10 (4.30 – 6.10)       | 4.80 (4.40 – 5.80)       | 5.00 (4.23 – 6.00)       | 5.55 (4.65 – 6.40)      | 5.15 (4.20 – 7.23)       | 4.70 (4.23 – 5.55)       | 0.252          |
| Creatinine (mg/dL)      | 0.89 (0.76 – 1.00)       | 0.84 (0.72 – 0.98)       | 0.95 (0.76 – 1.06)       | 0.95 (0.79 – 1.03)      | 0.89 (0.80 – 0.94)       | 0.83 (0.76 – 0.89)       | 0.342          |
| Fasting glucose (mg/dL) | 91.00 (86.00 – 95.00)    | 87.00 (83.00 – 93.00)    | 88.00 (85.00 – 92.00)    | 92.00 (89.00 – 96.50)   | 93.50 (90.00 – 95.00)    | 93.50 (87.50 – 96.75)    | 0.014          |
| Urea (mg/dL)            | 31.50 (27.00 – 36.00)    | 27.00 (23.00 – 32.00)    | 33.00 (29.50 – 37.00)    | 32.00 (29.00 – 36.50)   | 34.00 (30.75 – 37.75)    | 32.50 (29.25 – 36.50)    | <b>0.006</b>   |
| hs-CRP (mg/L)           | 0.48 (0.16 – 1.18)       | 0.21 (0.07 – 0.50)       | 0.76 (0.24 – 1.51)       | 0.37 (0.16 – 0.97)      | 1.19 (0.50 – 1.81)       | 0.66 (0.23 – 1.13)       | <b>0.003</b>   |

Data presented in median and interquartile interval. The logarithm (for VLDL and Triglycerides), quadratic (for TC), root square (for creatinine), and root cubic (for HDL and hs-CRP) transformations were used in the statistics. The variables not listed above were used the original data. G<sub>20-29</sub>: 20-29 years old group; G<sub>30-39</sub>: 30-39 years old group; G<sub>40-49</sub>: 40-49 years old group; G<sub>50-59</sub>: 50-59 years old group; G<sub>60-70</sub>: 60-70 years old group; HDL: high density lipoprotein; hs-CRP: high-sensitivity C-reactive protein; LDL: low density lipoprotein; TC: Total cholesterol; VLDL: very low density lipoprotein. One-way ANOVA with *P* <0.01.

**Supplementary Table S2.** Cardiac autonomic control among different age groups.

| Variables                      | G <sub>20-29</sub>          | G <sub>30-29</sub>         | G <sub>40-49</sub>         | G <sub>50-59</sub>         | G <sub>60-70</sub>        | P-value          |
|--------------------------------|-----------------------------|----------------------------|----------------------------|----------------------------|---------------------------|------------------|
| <i>Time domain Analysis</i>    |                             |                            |                            |                            |                           |                  |
| HP mean (ms)                   | 911.86 (828.53 – 983.22)    | 942.06 (854.99 – 1063.28)  | 924.40 (849.07 – 1026.68)  | 933.27 (891.21 – 1028.35)  | 975.17 (852.88 – 1056.47) | 0.430            |
| HP Variance (ms <sup>2</sup> ) | 2210.29 (1560.85 – 3355.20) | 1709.86 (929.65 – 3496.37) | 1345.62 (915.38 – 2210.50) | 1189.98 (844.33 – 1843.30) | 825.30 (557.82 – 1243.27) | <b>0.002</b>     |
| <i>Spectral Analysis</i>       |                             |                            |                            |                            |                           |                  |
| LF <sub>(ms<sup>2</sup>)</sub> | 811.26 (476.83 – 1302.74)   | 677.18 (264.04 – 1075.83)  | 460.33 (271.12 – 983.84)   | 373.88 (204.14 – 445.24)   | 176.44 (72.29 – 385.29)   | <b>&lt;0.001</b> |
| HF <sub>(ms<sup>2</sup>)</sub> | 798.68 (429.77 – 1854.86)   | 517.02 (326.89 – 970.09)   | 340.34 (188.32 – 589.96)   | 364.90 (122.54 – 627.22)   | 176.38 (93.68 – 359.37)   | <b>0.001</b>     |
| LF <sub>(nu)</sub>             | 45.37 (35.49 – 59.70)       | 49.39 (35.78 – 65.73)      | 60.43 (45.47 – 73.48)      | 56.53 (41.85 – 75.13)      | 44.91 (34.74 – 59.67)     | 0.460            |
| HF <sub>(nu)</sub>             | 51.67 (37.57 – 64.22)       | 50.46 (33.88 – 63.11)      | 39.48 (26.07 – 53.48)      | 42.88 (24.37 – 57.76)      | 53.52 (39.79 – 63.66)     | 0.524            |
| LF/HF <sub>(ratio)</sub>       | 0.88 (0.55 – 1.59)          | 0.98 (0.56 – 1.96)         | 1.55 (0.85 – 2.82)         | 1.32 (0.73 – 3.15)         | 0.84 (0.55 – 1.51)        | 0.635            |

Data presented in median and interquartile interval. The logarithm (HP mean, HP Variance, LF<sub>ms<sup>2</sup></sub>, HF<sub>ms<sup>2</sup></sub>, and LF/HF) transformation was used in the statistics. The variables not listed above were used the original data. G<sub>20-29</sub>: 20-29 years old group; G<sub>30-39</sub>: 30-39 years old group; G<sub>40-49</sub>: 40-49 years old group; G<sub>50-59</sub>: 50-59 years old group; G<sub>60-70</sub>: 60-70 years old group; HF: high frequency band; HP: heart period; LF: low frequency band. One-way ANOVA with  $P < 0.01$ .

**Supplementary Table S3.** Compounds identified on  $^1\text{H}$  NMR and submitted to statistical analysis considering the age groups.

| Metabolite             | Data transformation       | <i>P</i> -value |
|------------------------|---------------------------|-----------------|
| Valine                 | Inverse                   | < <b>0.001</b>  |
| Isoleucine             | Natural Logarithm         | < <b>0.001</b>  |
| 3-Hydroxyisobutyrate   | Natural Logarithm         | <b>0.003</b>    |
| Leucine                | Natural Logarithm         | <b>0.003</b>    |
| Aspartate              | Original                  | <b>0.007</b>    |
| Choline                | Original                  | 0.018           |
| Dimethyl sulfone       | Square Root               | 0.025           |
| Lactate                | Natural Logarithm         | 0.030           |
| 2-Hydroxyisovalerate   | Natural Logarithm         | 0.041           |
| Serine                 | Quadratic                 | 0.043           |
| Succinate              | Natural Logarithm         | 0.044           |
| Threonine              | Cubic Root                | 0.046           |
| Acetoacetate           | Natural Logarithm         | 0.062           |
| Ornithine              | Original                  | 0.067           |
| Phenylalanine          | Natural Logarithm         | 0.079           |
| Glutamine              | Original                  | 0.082           |
| Creatinine             | Original                  | 0.093           |
| Methionine             | Natural Logarithm         | 0.131           |
| Betaine                | Cubic Root                | 0.160           |
| Formate                | Inverse                   | 0.171           |
| Lysine                 | Square Root               | 0.179           |
| 2-Hydroxybutyrate      | Natural Logarithm         | 0.232           |
| N,N-Dimethylglycine    | Square Root               | 0.242           |
| Glucose                | Natural Logarithm         | 0.294           |
| Alanine                | Original                  | 0.308           |
| Anserine               | Natural Logarithm         | 0.330           |
| 3-Hydroxybutyrate      | Natural Logarithm         | 0.389           |
| 2-Oxoisocaproate       | Original                  | 0.410           |
| Tyrosine               | Inverse                   | 0.437           |
| Pyruvate               | Cubic Root                | 0.461           |
| Asparagine             | Original                  | 0.495           |
| Dimethylamine          | Original                  | 0.520           |
| Ascorbate              | Square Root               | 0.555           |
| Glycine                | Original                  | 0.572           |
| Proline                | Natural Logarithm         | 0.585           |
| Histidine              | Quadratic                 | 0.732           |
| O-Acetylcarnitine      | Original (non-parametric) | 0.759*          |
| 2-Oxoglutarate         | Original                  | 0.790           |
| 3-Methyl-2-oxovalerate | Original                  | 0.794           |
| Trimethylamine         | Square Root               | 0.809           |
| Glycerol               | Natural Logarithm         | 0.812           |
| Acetate                | Natural Logarithm         | 0.829           |
| Citrate                | Square Root               | 0.899           |
| Hypoxanthine           | Natural Logarithm         | 0.921           |
| Sarcosine              | Natural Logarithm         | 0.924           |
| Creatine               | Cubic Root                | 0.932           |
| Ethanol                | Inverse                   | 0.989           |

\*Kruskal-Wallis test. One-way ANOVA with  $P < 0.01$ .

**Supplementary Table S4.** Chemical structure and chemical shift ( $\delta$  - ppm) of metabolites that showed statistical significance during the aging process observed in  $^1\text{H}$  NMR.

| N <sup>o</sup> | Compounds and Structure                                                                                     | $\delta$ $^1\text{H}$ ppm<br>(Multiplicity*, N <sup>o</sup> H, J)                                                                            | COSY<br>$^1\text{H}/^1\text{H}$                        | HSQC<br>$^{13}\text{C}/^1\text{H}$                                                           | HMBC                                                   |
|----------------|-------------------------------------------------------------------------------------------------------------|----------------------------------------------------------------------------------------------------------------------------------------------|--------------------------------------------------------|----------------------------------------------------------------------------------------------|--------------------------------------------------------|
| 1              | Aspartate<br>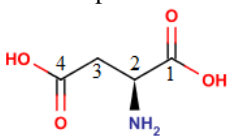              | 1. ---<br>2. 3.88-3.90 (m – 1H)<br>3. 2.65 (dd – 2H, 17.5 Hz, 8.88 Hz)<br>3. 2.80 (dd – 2H, 17.5 Hz, 3.64 Hz)<br>4. ---                      | 2. 3.88-3.90/2.65<br>2. 3.88-3.90/2.80                 | Unobserved                                                                                   | 3. 182.0                                               |
| 2              | Isoleucine<br>             | 1. ---<br>2. 3.66 (d – 1H)<br>3. 1.94-2.00 (m – 1H)<br>4. 1.24-1.45 (m – 2H)<br>5. 0.92 (t – 3H)<br>6. 0.99 (d – 3H, 7.02 Hz)                | 3. 1.94-2.00/1.45<br>5. 0.92/1.45<br>6. 0.99/1.94-2.00 | 2. 62.7/3.66<br>5. 13.8/0.92<br>6. 17.6/0.99                                                 | 5. 27.7<br>6. 27.7; 38.9; 62.7                         |
| 3              | Leucine<br>               | 1. ---<br>2. 3.71-3.73 (m – 1H)<br>3. 1.65-1.75 (m – 2H)<br>4. 1.65-1.75 (m – 1H)<br>5. 0.94 (d – 3H, 6.60 Hz)<br>5'. 0.95 (d – 3H, 6.60 Hz) | 2. 3.71-3.73/1.72<br>5. 0.94/1.69<br>5'. 0.95/1.69     | 2. 56.2/3.71-3.73<br>3. 27.0/1.65-1.75<br>4. 42.8/1.65-1.75<br>5. 24.7/0.94<br>5'. 24.7/0.95 | 3. 42.8<br>5. 24.7; 27.0; 42.8<br>5'. 24.7; 27.0; 42.8 |
| 4              | 3-Hydroxyisobutyrate<br> | 1. ---<br>2. 2.44-2.50 (m – 1H)<br>3. 3.51-3.55 (m – 2H)<br>4. 1.06 (d – 3H, 7.15 Hz)                                                        | 2. 2.44-2.50/1.06                                      | 3. 3.51-3.55/65.5<br>4. 1.06/19.1                                                            | 3. 175.4                                               |
| 5              | Valine<br>               | 1. ---<br>2. 3.59 (d – 1H, 4.50 Hz)<br>3. 2.22-2.30 (m)<br>4. 0.97 (d – 3H, 7.00 Hz)<br>4'. 1.03 (d – 3H, 7.00 Hz)                           | 4. 0.97/2.26<br>4'. 1.03/2.26                          | 2. 63.3/3.59<br>3. 31.3/2.22-2.30<br>4. 19.7/0.97<br>4' 20.9/1.03                            | 4. 20.9; 31.3; 63.3<br>4'. 19.7; 31.3; 63.3            |

\*Inferred multiplicity based on the Chenomx library. Singlet (s); doublet (d); triplet (t); multiplet (m).

**Supplementary Table S5.** Features detected on LC-HRMS and submitted to statistical analysis considering the age groups.

| <i>m/z</i> | <b>Ionization mode</b> | <b>Data transformation</b> | <b><i>P</i>-value</b> |
|------------|------------------------|----------------------------|-----------------------|
| 178.0508   | Negative               | Natural Logarithm          | <b>&lt;0.001</b>      |
| 129.0560   | Negative               | Inverse                    | <b>&lt;0.001</b>      |
| 298.2743   | Positive               | Natural Logarithm          | <b>0.001</b>          |
| 537.4164   | Negative               | Natural Logarithm          | <b>0.004</b>          |
| 872.6302   | Positive               | Inverse                    | <b>0.009</b>          |
| 593.4791   | Negative               | Cubic Root                 | <b>0.009</b>          |
| 586.3139   | Negative               | Natural Logarithm          | 0.011                 |
| 655.2784   | Positive               | Natural Logarithm          | 0.012                 |
| 467.3731   | Negative               | Natural Logarithm          | 0.015                 |
| 696.5247   | Positive               | Natural Logarithm          | 0.019                 |
| 144.9234   | Negative               | Original (non-parametric)  | 0.021*                |
| 145.0619   | Negative               | Natural Logarithm          | 0.021                 |
| 916.6549   | Positive               | Natural Logarithm          | 0.025                 |
| 100.9334   | Negative               | Square Root                | 0.028                 |
| 868.5977   | Positive               | Inverse                    | 0.043                 |
| 652.4982   | Positive               | Inverse                    | 0.044                 |
| 167.0212   | Negative               | Square Root                | 0.052                 |
| 293.1759   | Negative               | Cubic Root                 | 0.061                 |
| 698.7851   | Positive               | Cubic Root                 | 0.065                 |
| 1086.1771  | Positive               | Natural Logarithm          | 0.066                 |
| 617.7374   | Negative               | Original                   | 0.068                 |
| 731.3168   | Negative               | Square Root                | 0.075                 |
| 195.0873   | Positive               | Cubic Root                 | 0.078                 |
| 203.0824   | Negative               | Cubic Root                 | 0.078                 |
| 191.0196   | Negative               | Original                   | 0.091                 |
| 619.7504   | Positive               | Original                   | 0.092                 |
| 195.8108   | Negative               | Original (non-parametric)  | 0.092*                |
| 599.3807   | Positive               | Inverse                    | 0.103                 |
| 942.3430   | Negative               | Natural Logarithm          | 0.109                 |
| 173.0816   | Negative               | Natural Logarithm          | 0.122                 |
| 564.4467   | Positive               | Inverse                    | 0.130                 |
| 612.3302   | Negative               | Natural Logarithm          | 0.138                 |
| 853.5210   | Positive               | Quadratic                  | 0.138                 |
| 415.2107   | Positive               | Cubic Root                 | 0.156                 |
| 117.0555   | Negative               | Natural Logarithm          | 0.158                 |
| 284.2944   | Positive               | Natural Logarithm          | 0.160                 |
| 256.2635   | Positive               | Original (non-parametric)  | 0.178*                |
| 384.3453   | Positive               | Quadratic                  | 0.188                 |
| 187.0973   | Negative               | Natural Logarithm          | 0.200                 |
| 484.2277   | Negative               | Square Root                | 0.241                 |
| 199.8048   | Negative               | Original (non-parametric)  | 0.279*                |
| 853.5209   | Positive               | Quadratic                  | 0.282                 |
| 663.2650   | Positive               | Original                   | 0.299                 |
| 686.4438   | Positive               | Inverse                    | 0.300                 |
| 130.0872   | Negative               | Original                   | 0.302                 |
| 359.3168   | Positive               | Cubic Root                 | 0.313                 |
| 380.2553   | Positive               | Natural Logarithm          | 0.330                 |
| 381.1734   | Negative               | Original                   | 0.331                 |
| 187.0071   | Negative               | Cubic Root                 | 0.344                 |
| 281.2480   | Negative               | Original                   | 0.348                 |
| 228.1953   | Positive               | Natural Logarithm          | 0.371                 |
| 702.5082   | Positive               | Cubic Root                 | 0.381                 |
| 766.4569   | Positive               | Quadratic                  | 0.410                 |
| 162.8390   | Negative               | Original                   | 0.412                 |
| 648.3784   | Positive               | Natural Logarithm          | 0.427                 |
| 603.7898   | Positive               | Square Root                | 0.455                 |
| 696.7722   | Negative               | Original                   | 0.457                 |

**Supplementary Table S5. Cont.**

| <i>m/z</i> | <b>Ionization Mode</b> | <b>Data transformation</b> | <i>P-value</i> |
|------------|------------------------|----------------------------|----------------|
| 350.2103   | Positive               | Natural Logarithm          | 0.458          |
| 746.4421   | Positive               | Original                   | 0.459          |
| 310.3093   | Positive               | Inverse                    | 0.467          |
| 824.4991   | Negative               | Original                   | 0.482          |
| 432.2786   | Positive               | Square Root                | 0.491          |
| 737.4358   | Positive               | Original                   | 0.498          |
| 686.3570   | Positive               | Natural Logarithm          | 0.515          |
| 628.4038   | Positive               | Original (non-parametric)  | 0.527*         |
| 604.3523   | Positive               | Natural Logarithm          | 0.539          |
| 89.0242    | Negative               | Original                   | 0.544          |
| 744.4863   | Positive               | Inverse                    | 0.554          |
| 708.4155   | Positive               | Original                   | 0.557          |
| 128.0353   | Negative               | Square Root                | 0.563          |
| 540.3310   | Negative               | Quadratic                  | 0.572          |
| 282.2792   | Positive               | Original                   | 0.574          |
| 112.9856   | Negative               | Inverse                    | 0.595          |
| 180.0665   | Negative               | Natural Logarithm          | 0.609          |
| 355.1578   | Negative               | Original                   | 0.614          |
| 164.0714   | Negative               | Inverse                    | 0.623          |
| 183.0840   | Positive               | Cubic Root                 | 0.625          |
| 145.0504   | Negative               | Original (non-parametric)  | 0.626*         |
| 388.2532   | Positive               | Natural Logarithm          | 0.626          |
| 766.4569   | Positive               | Quadratic                  | 0.635          |
| 426.3569   | Positive               | Natural Logarithm          | 0.641          |
| 568.3611   | Negative               | Natural Logarithm          | 0.667          |
| 255.2325   | Negative               | Natural Logarithm          | 0.667          |
| 833.5036   | Positive               | Original                   | 0.668          |
| 383.1894   | Negative               | Original (non-parametric)  | 0.670*         |
| 283.2637   | Negative               | Quadratic                  | 0.676          |
| 452.2026   | Positive               | Cubic Root                 | 0.679          |
| 824.4991   | Positive               | Quadratic                  | 0.685          |
| 773.5058   | Positive               | Inverse                    | 0.723          |
| 426.1868   | Positive               | Natural Logarithm          | 0.728          |
| 164.8360   | Negative               | Square Root                | 0.732          |
| 802.5591   | Negative               | Inverse                    | 0.733          |
| 395.2744   | Negative               | Original                   | 0.736          |
| 337.1666   | Positive               | Natural Logarithm          | 0.738          |
| 1102.1848  | Positive               | Original                   | 0.745          |
| 653.2665   | Negative               | Original                   | 0.748          |
| 614.3443   | Negative               | Natural Logarithm          | 0.763          |
| 452.2029   | Positive               | Natural Logarithm          | 0.763          |
| 378.2411   | Negative               | Inverse                    | 0.769          |
| 118.0863   | Positive               | Original                   | 0.790          |
| 795.4797   | Positive               | Original                   | 0.791          |
| 158.9781   | Negative               | Original                   | 0.810          |
| 303.2325   | Negative               | Natural Logarithm          | 0.815          |
| 119.0863   | Positive               | Square Root                | 0.817          |
| 158.1537   | Positive               | Cubic Root                 | 0.823          |
| 516.3006   | Positive               | Natural Logarithm          | 0.828          |
| 717.7568   | Positive               | Original                   | 0.830          |
| 532.2993   | Negative               | Original                   | 0.853          |
| 775.4643   | Positive               | Original                   | 0.855          |
| 795.4788   | Positive               | Original (non-parametric)  | 0.862*         |
| 103.0398   | Negative               | Square Root                | 0.868          |
| 147.0759   | Positive               | Original                   | 0.873          |
| 538.3141   | Positive               | Natural Logarithm          | 0.879          |
| 279.2327   | Negative               | Cubic Root                 | 0.900          |
| 657.4222   | Positive               | Cubic Root                 | 0.904          |



**Supplementary Table S5. Cont.**

| <i>m/z</i> | <b>Ionization Mode</b> | <b>Transformation used</b> | <i>P-value</i> |
|------------|------------------------|----------------------------|----------------|
| 583.2555   | Negative               | Natural Logarithm          | 0.910          |
| 583.2560   | Negative               | Natural Logarithm          | 0.912          |
| 379.1576   | Negative               | Square Root                | 0.916          |
| 476.2775   | Negative               | Natural Logarithm          | 0.923          |
| 271.2270   | Negative               | Natural Logarithm          | 0.943          |
| 161.0955   | Positive               | Natural Logarithm          | 0.955          |
| 560.3259   | Positive               | Cubic Root                 | 0.958          |
| 636.2596   | Negative               | Original                   | 0.992          |
| 692.4049   | Positive               | Original (non-parametric)  | 0.994*         |
| 500.2775   | Negative               | Natural Logarithm          | 0.996          |

\*Kruskal-Wallis test. One-way ANOVA with  $P < 0.01$ .

**Supplementary Table S6.** LC-HRMS data of the statistically significant features identified in serum samples.

| Features      | HMDB code   | Formula                                        | Monoisotopic Mass | Adduct                            | Adduct <i>m/z</i> | Error (ppm) |
|---------------|-------------|------------------------------------------------|-------------------|-----------------------------------|-------------------|-------------|
| Hippuric Acid | HMDB0000714 | C <sub>9</sub> H <sub>9</sub> NO <sub>3</sub>  | 179.0582          | [M-H] <sup>-</sup>                | 178.0508          | 1           |
| 10E,12Z-CLA   | HMDB0005048 | C <sub>18</sub> H <sub>32</sub> O <sub>2</sub> | 280.2402          | [M+NH <sub>4</sub> ] <sup>+</sup> | 298.2743          | 1           |
| Unknown       | -           | -                                              | -                 | Negative                          | 129.0560          | -           |
| Unknown       | -           | -                                              | -                 | Negative                          | 537.4164          | -           |
| Unknown       | -           | -                                              | -                 | Positive                          | 872.6302          | -           |
| Unknown       | -           | -                                              | -                 | Negative                          | 593.4791          | -           |

10E,12Z-CLA: 10E,12Z-octadecadienoic acid.

**Supplementary Figure S1.** Instrumental stability assessed through quality control samples.

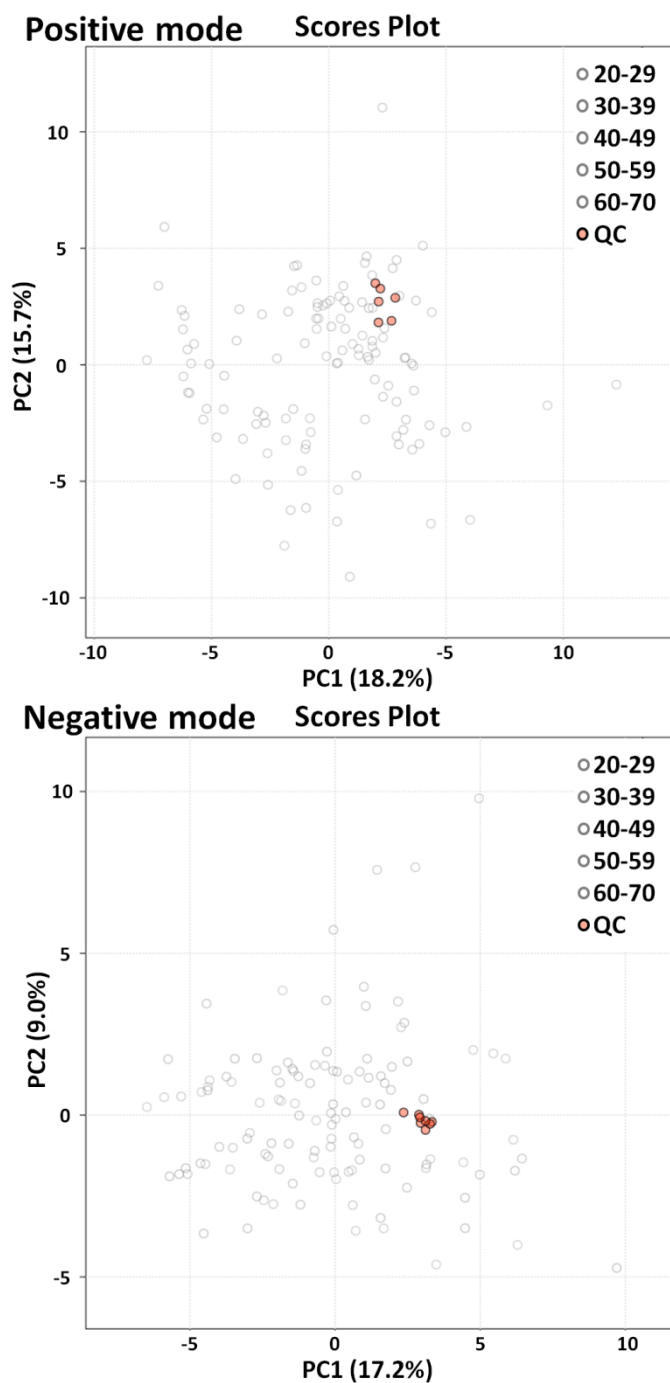

The missing data were replaced by the feature mean and the data were submitted to auto scaling (mean-centered and divided by the standard deviation of each variable). All other treatments were previously performed in Excel software (exclusion of features with missing data > 10%, with values similar to blank samples, and with a coefficient of variation in QCs greater than 20%). QC: quality control samples; PC: principal component. Data processed in *Metaboanalyst 5.0* software (<https://www.metaboanalyst.ca/>).

**Supplementary Figure S2:** Representation of the serum 1D  $^1\text{H}$  NMR spectrum region where the main metabolites were quantified for a single participant.

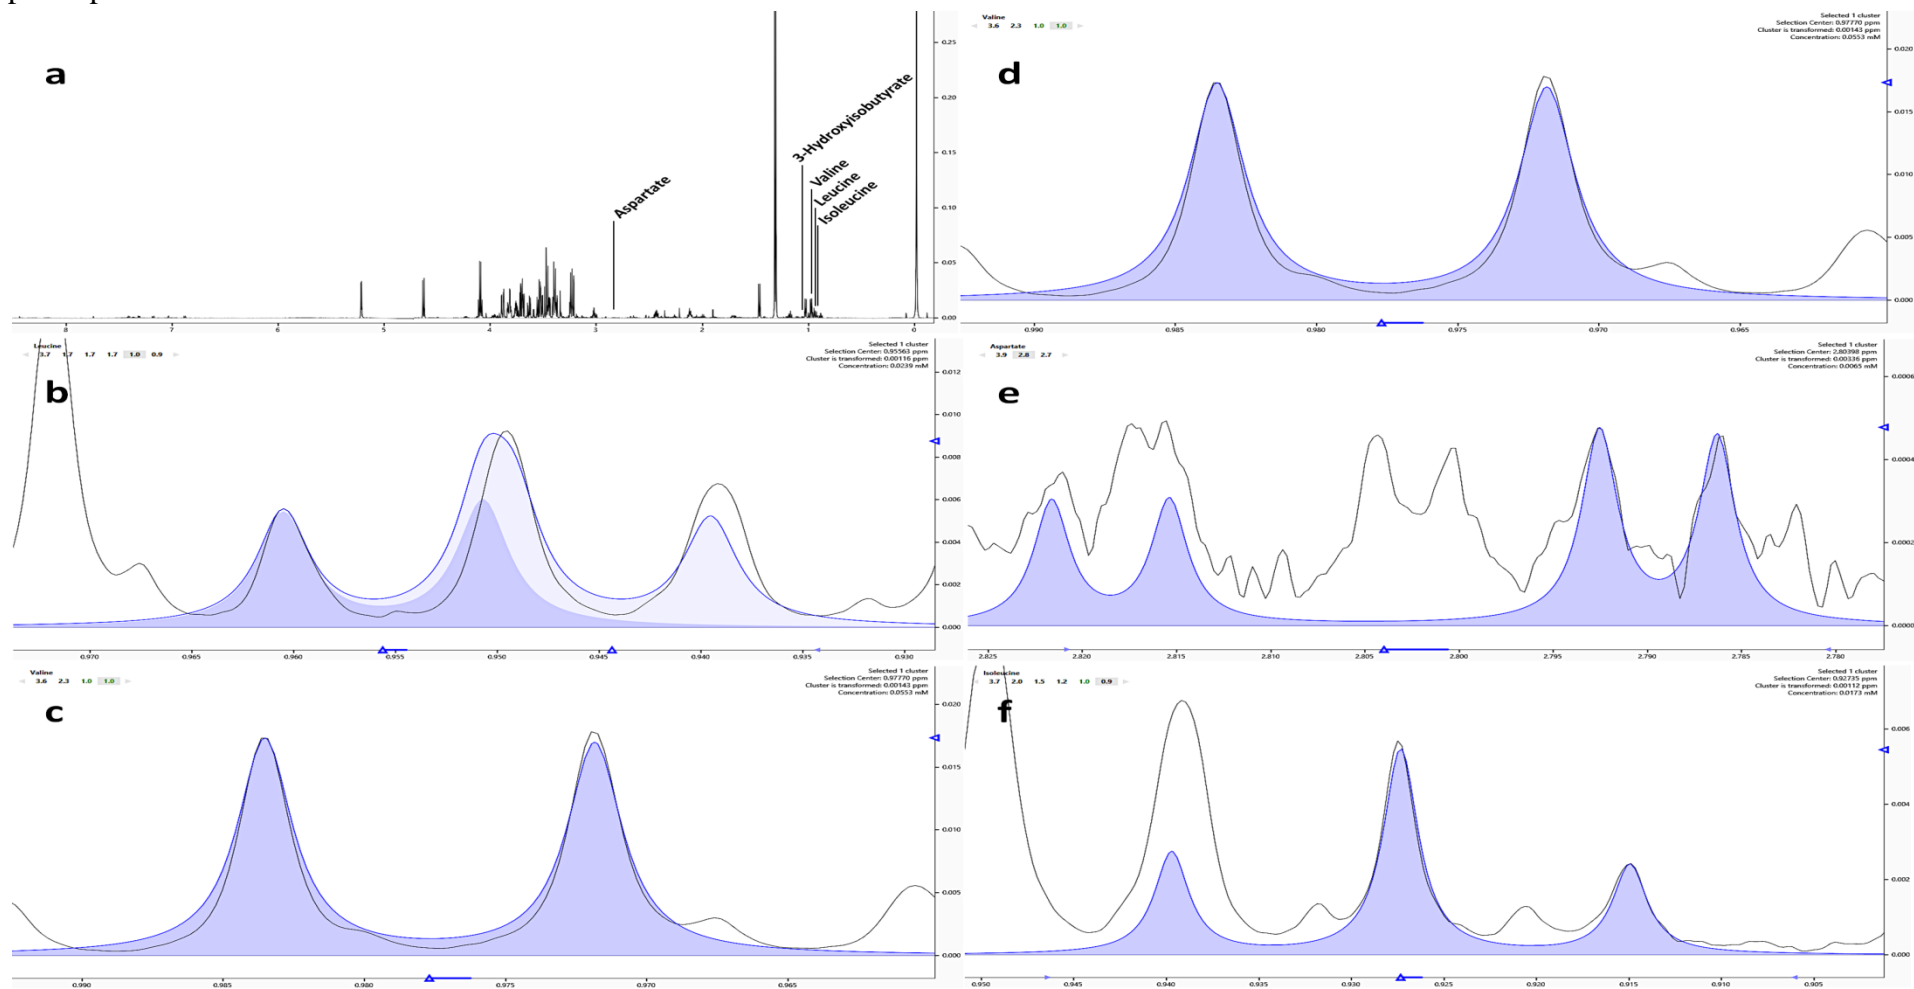

(a): Entire Spectrum; (b): Leucine; (c): Valine; (d): 3-Hydroxyisobutyrate; (e): Aspartate; (f): Isoleucine.

**Supplementary Figure S3.** Principal components analysis considering the five main components with eigenvalues greater than 1 for all significant variables between the age groups.

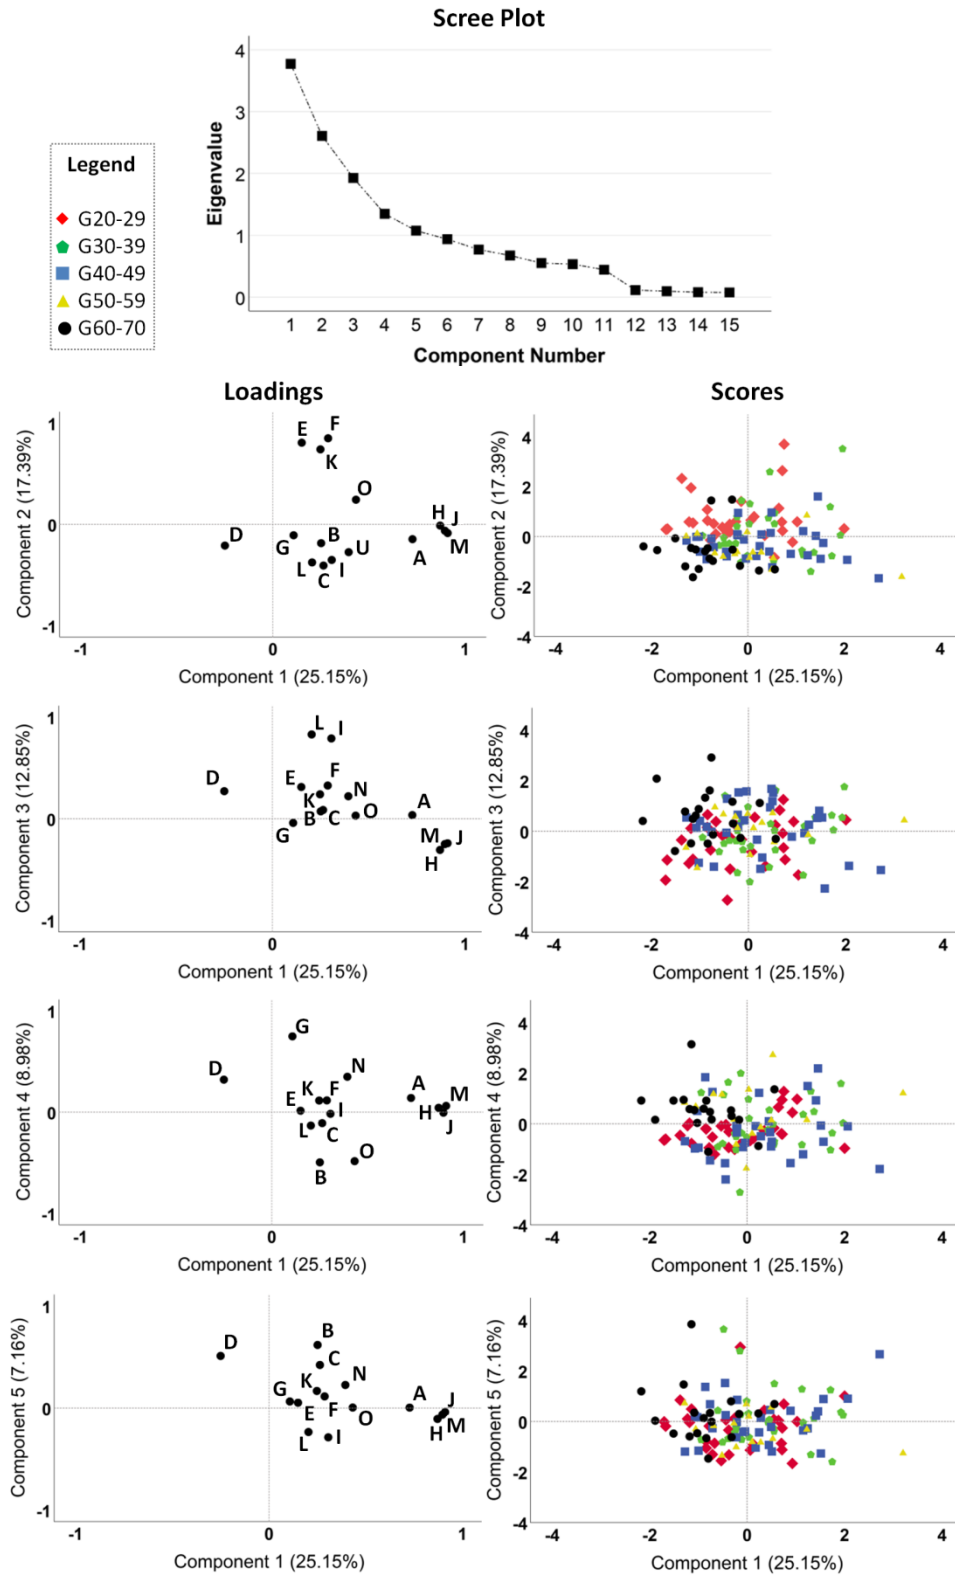

A: 3-Hydroxyisobutyrate; B: 10E,12Z-octadecadienoic acid; C: Aspartate; D: Hippuric acid; E: high frequency band; F: heart period variance; G: high-sensitivity C-reactive protein; H: Isoleucine; I: low density lipoprotein; J: Leucine; K: low frequency band; L: Total cholesterol; M: Valine; N: urea; O: peak oxygen consumption.
